# Supplementary material for: Circular valorization of coffee silverskin through supercritical CO2 for the production of functional extracts
Source: Royal Society of Chemistry journal article supplement (doi:10.1039/d3su00037k), 2023-01-01
Supplement: d3su00037k1.pdf [file d3su00037k1.pdf]

## SUPPLEMENTARY INFORMATION

### Circular Valorization of Coffee Silverskin through Supercritical CO<sub>2</sub> for Functional Extracts Production

Stefania Marzorati,<sup>\*a</sup> Amparo Jiménez-Quero,<sup>b</sup> Alessio Massironi,<sup>a</sup> Rita Nasti<sup>a</sup> and Luisella Verotta<sup>a</sup>

<sup>a</sup> Department of Environmental Science and Policy, Università degli Studi di Milano, Via Celoria 2, 20133, Milano, Italy.

<sup>b</sup> Division of Glycoscience, Department of Chemistry, School of Engineering Sciences in Chemistry, Biotechnology and Health, Royal Institute of Technology, Stockholm, Sweden.

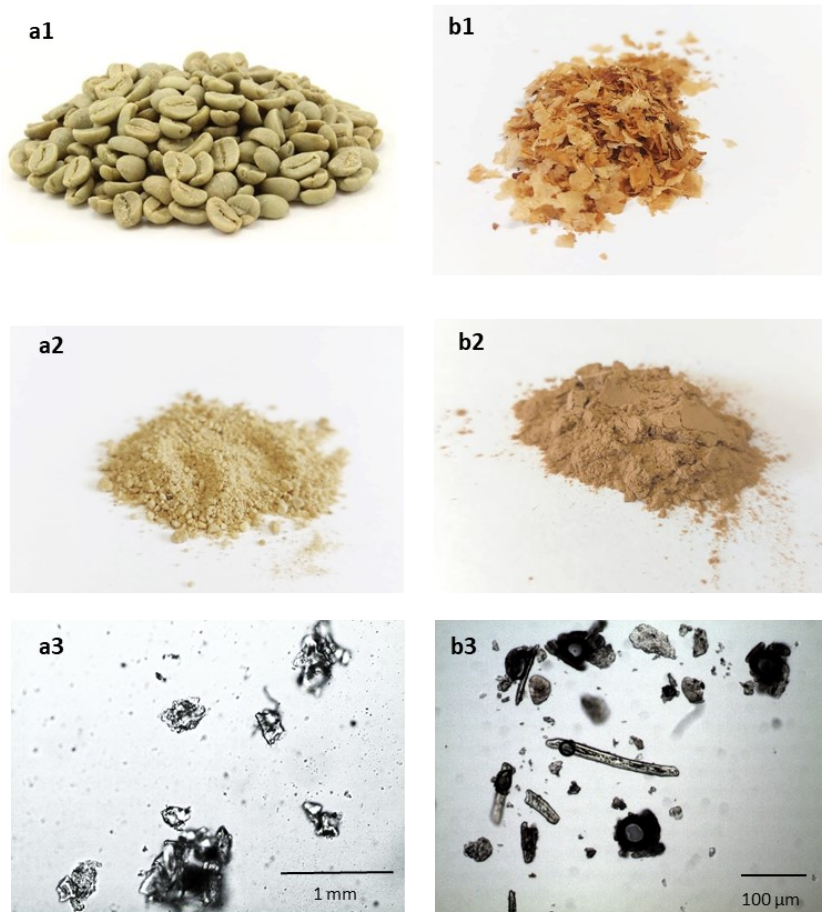

Fig. S1 - Processed biomasses. a1) image of green coffee beans; a2) image of blended green coffee beans; a3) optical microscope images of blended green coffee beans; b1) image of silverskin; b2) image of micronized silverskin; b3) optical microscope images of micronized silverskin.

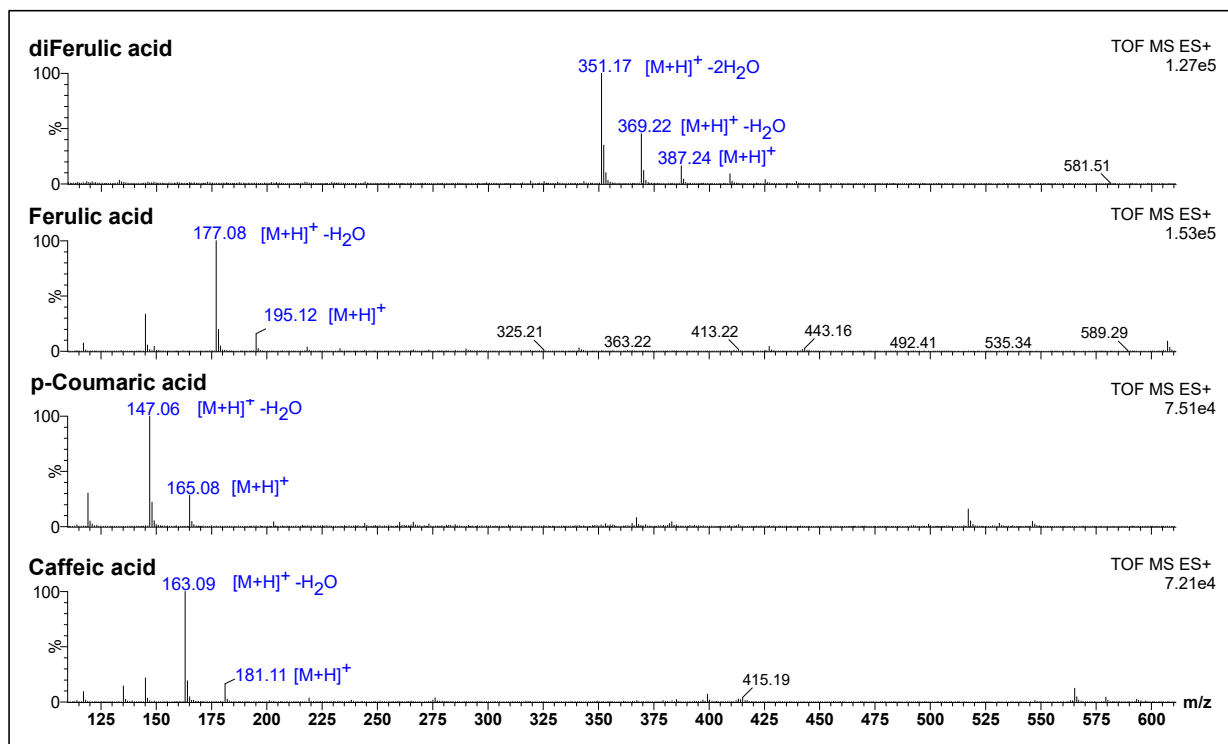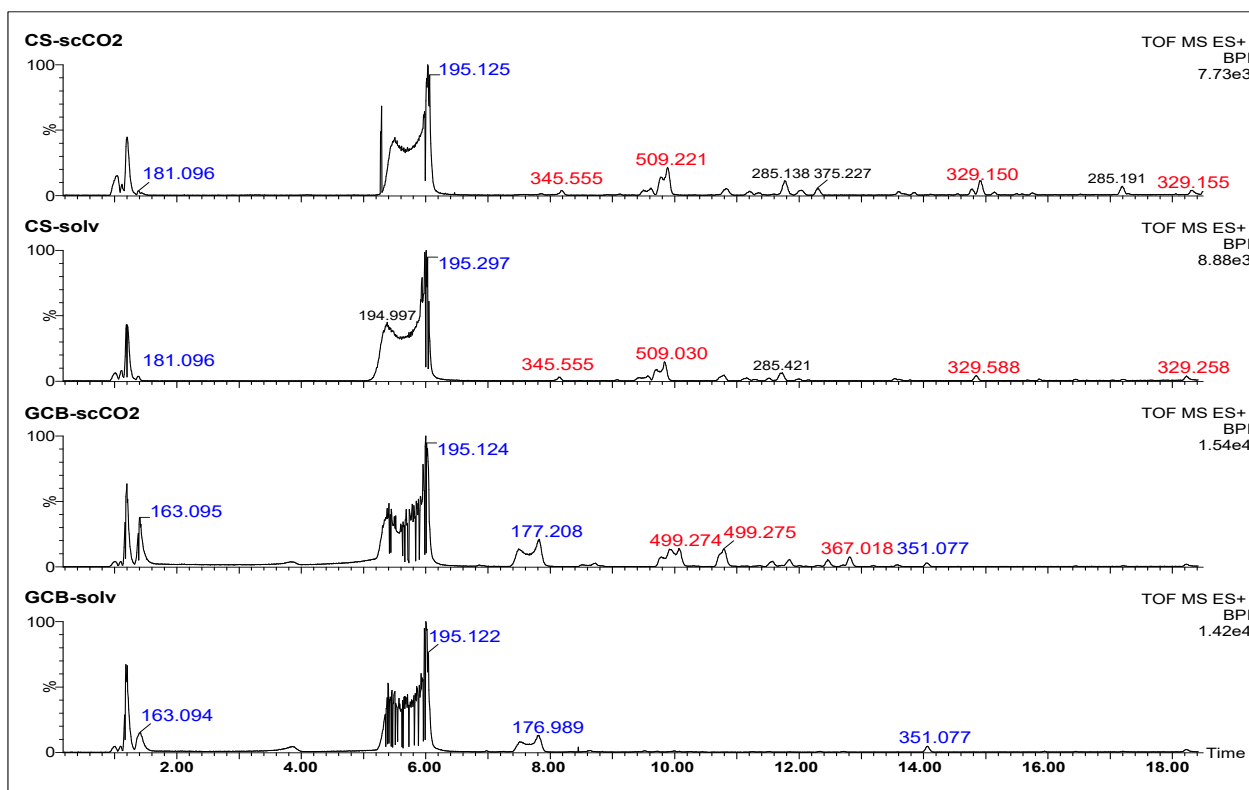

Figure S3 – LC-ESI-MS profile of the extracts from conventional solvent extraction and sc-CO<sub>2</sub> of green coffee beans and coffee silverskin biomasses prior saponification.

Fig. S2 - ESI-MS profile of the standards of diferulic acid, ferulic acid, p-coumaric acid and caffeic acid.

Table S1. Hydroxycinnamic acid quantification after saponification by HPLC-UV

| <i>mg/g of sample</i>   | <b>GCB-solv</b>         | <b>GCB-scCO<sub>2</sub></b> | <b>CS-solv</b>        | <b>CS-scCO<sub>2</sub></b> |
|-------------------------|-------------------------|-----------------------------|-----------------------|----------------------------|
| Caffeic acid            | 9.213 ( $\pm 1.315$ )   | 114.087 ( $\pm 3.241$ )     | 1.871 ( $\pm 0.030$ ) | 0.138 ( $\pm 0.025$ )      |
| <i>p</i> -Coumaric acid | 4.818 ( $\pm 0.313$ )   | 6.839 ( $\pm 0.294$ )       | <i>n.d.</i>           | <i>n.d.</i>                |
| Ferulic acid            | 154.507 ( $\pm 5.989$ ) | 224.826 ( $\pm 0.930$ )     | 3.953 ( $\pm 0.039$ ) | 4.692 ( $\pm 0.332$ )      |

*n.d.* (non-detected)

Table S2. Mass values of the different compounds analysed by LC-ESI-MS

| Compounds               | Molar mass (g/mol) | m/z [ $+H$ ] <sup>+</sup> | m/z dehydrated [ $-H_2O +H$ ] <sup>+</sup>                               |
|-------------------------|--------------------|---------------------------|--------------------------------------------------------------------------|
| <i>p</i> -Coumaric acid | 164                | 165                       | 147                                                                      |
| Caffeic acid (CA)       | 180                | 181                       | 163                                                                      |
| Ferulic acid (FA)       | 194                | 195                       | 177                                                                      |
| 5-5'-diferulic acid     | 386                | 387                       | 369<br>351 [ $M-2H_2O +H$ ] <sup>+</sup>                                 |
| Hexose                  |                    |                           | 180                                                                      |
| Pentose                 |                    |                           | 150                                                                      |
| FA-pentose              |                    |                           | 194+150<br>329 [ $+2H$ ] <sup>+</sup>                                    |
| FA-hexose               |                    |                           | 194+180<br>359 [ $+2H$ ] <sup>+</sup>                                    |
| CA-hexose               |                    |                           | 180+180<br>345 [ $+2H$ ] <sup>+</sup><br>367 [ $+2H + Na$ ] <sup>+</sup> |
| FA-Hexo-pentose         |                    |                           | 194+150+150<br>509 [ $+2H$ ] <sup>+</sup>                                |
| CA-Hexo-pentose         |                    |                           | 180+180+150<br>499 [ $+2H + Na$ ] <sup>+</sup>                           |
